# Supplementary material
Source: Elsevier journal article supplement (https://www.sciencedirect.com/science/article/pii/S0212656721000585)
Supplement: mmc1 [file S0212656721000585:mmc1.doc]

Supplemental online material 1

STARD checklist for reporting of studies of diagnostic accuracy

| **Section and Topic** | **Item**  **#** |  | **On page #** |
| --- | --- | --- | --- |
| TITLE/ABSTRACT/  KEYWORDS | 1 | Identify the article as a study of diagnostic accuracy (recommend MeSH heading 'sensitivity and specificity'). | 1-2 |
| INTRODUCTION | 2 | State the research questions or study aims, such as estimating diagnostic accuracy or comparing accuracy between tests or across participant groups. | 5 |
| METHODS |  |  |  |
| *Participants* | 3 | The study population: The inclusion and exclusion criteria, setting and locations where data were collected. | 6 |
|  | 4 | Participant recruitment: Was recruitment based on presenting symptoms, results from previous tests, or the fact that the participants had received the index tests or the reference standard? | 6  Fig. 1 |
|  | 5 | Participant sampling: Was the study population a consecutive series of participants defined by the selection criteria in item 3 and 4? If not, specify how participants were further selected. | 6  Fig. 1 |
|  | 6 | Data collection: Was data collection planned before the index test and reference standard were performed (prospective study) or after (retrospective study)? | 6  Fig. 1 |
| *Test methods* | 7 | The reference standard and its rationale. | 7-8 |
|  | 8 | Technical specifications of material and methods involved including how and when measurements were taken, and/or cite references for index tests and reference standard. | 7-8 |
|  | 9 | Definition of and rationale for the units, cut-offs and/or categories of the results of the index tests and the reference standard. | 7-8 |
|  | 10 | The number, training and expertise of the persons executing and reading the index tests and the reference standard. | 6 |
|  | 11 | Whether or not the readers of the index tests and reference standard were blind (masked) to the results of the other test and describe any other clinical information available to the readers. | 6 |
| *Statistical methods* | 12 | Methods for calculating or comparing measures of diagnostic accuracy, and the statistical methods used to quantify uncertainty (e.g. 95% confidence intervals). | 7-8 |
|  | 13 | Methods for calculating test reproducibility, if done. | 7-8 |
| RESULTS |  |  |  |
| *Participants* | 14 | When study was performed, including beginning and end dates of recruitment. | 6  Fig 1 |
|  | 15 | Clinical and demographic characteristics of the study population (at least information on age, gender, spectrum of presenting symptoms). | Tabla 1 |
|  | 16 | The number of participants satisfying the criteria for inclusion who did or did not undergo the index tests and/or the reference standard; describe why participants failed to undergo either test (a flow diagram is **strongly** recommended). | Fig 1 |
| *Test results* | 17 | Time-interval between the index tests and the reference standard, and any treatment administered in between. | 6-7 |
|  | 18 | Distribution of severity of disease (define criteria) in those with the target condition; other diagnoses in participants without the target condition. | Tabla 1 |
|  | 19 | A cross tabulation of the results of the index tests (including indeterminate and missing results) by the results of the reference standard; for continuous results, the distribution of the test results by the results of the reference standard. | Tabla 2, 3, 4 |
|  | 20 | Any adverse events from performing the index tests or the reference standard. | 8 |
| *Estimates* | 21 | Estimates of diagnostic accuracy and measures of statistical uncertainty (e.g. 95% confidence intervals). | 8-10  Tabla 2, 3, 4 |
|  | 22 | How indeterminate results, missing data and outliers of the index tests were handled. | 8-10 |
|  | 23 | Estimates of variability of diagnostic accuracy between subgroups of participants, readers or centers, if done. | No aplica |
|  | 24 | Estimates of test reproducibility, if done. | 9 |
| DISCUSSION | 25 | Discuss the clinical applicability of the study findings. | 10 |

**STROBE Statement—checklist of items that should be included in reports of observational studies**

**YOU MUST CHECK EACH ITEM AS APPROPRIATE FOR YOUR PAPER AND SPECIFY PAGE(S) OF MANUSCRIPT WHERE INFORMATION CAN BE FOUND.**

|  | Item No | Recommendation |
| --- | --- | --- |
| **Title and abstract** | 1 | (*a*) Indicate the study’s design with a commonly used term in the title or the abstract |
| (*b*) Provide in the abstract an informative and balanced summary of what was done and what was found  page(s) Page 1 |
| Introduction | | |
| Background/rationale | 2 | Explain the scientific background and rationale for the investigation being reported  page(s) Pages 5-6 |
| Objectives | 3 | State specific objectives, including any prespecified hypotheses  page(s) Page 6 |
| Methods | | |
| Study design | 4 | Present key elements of study design early in the paper  page(s) Methods Page 6 |
| Setting | 5 | Describe the setting, locations, and relevant dates, including periods of recruitment, exposure, follow-up, and data collection  page(s) Methods-Procedures page 7 |
| Participants | 6 | (*a*) *Cohort study*—Give the eligibility criteria, and the sources and methods of selection of participants. Describe methods of follow-up  page(s) Page 6  *Case-control study*—Give the eligibility criteria, and the sources and methods of case ascertainment and control selection. Give the rationale for the choice of cases and controls  page(s) Click here to enter text.  *Cross-sectional study*—Give the eligibility criteria, and the sources and methods of selection of participants  pages Methods-Participants page 6 |
| (*b*)*Cohort study*—For matched studies, give matching criteria and number of exposed and unexposed  page(s) Click here to enter text.  *Case-control study*—For matched studies, give matching criteria and the number of controls per case  page(s) Click here to enter text. |
| Variables | 7 | Clearly define all outcomes, exposures, predictors, potential confounders, and effect modifiers. Give diagnostic criteria, if applicable  page(s) Diagnostic criteria-Page 6 / outcomes-pages 8-10 |
| Data sources/ measurement | 8* | For each variable of interest, give sources of data and details of methods of assessment (measurement). Describe comparability of assessment methods if there is more than one group  page(s) outcome measures Pages 8-10 |
| Bias | 9 | Describe any efforts to address potential sources of bias  page(s) 9 |
| Study size | 10 | Explain how the study size was arrived at  page(s) Page 6 |
| Quantitative variables | 11 | Explain how quantitative variables were handled in the analyses. If applicable, describe which groupings were chosen and why  page(s) Results section, pages 8-10 |
| Statistical methods | 12 | (*a*) Describe all statistical methods, including those used to control for confounding  page(s) 8 |
| (*b*) Describe any methods used to examine subgroups and interactions  page(s) 8 |
| (*c*) Explain how missing data were addressed  page(s) N/A |
| (*d*) *Cohort study*—If applicable, explain how loss to follow-up was addressed **[ N/A ]**  *Case-control study*—If applicable, explain how matching of cases and controls was addressed  page(s) N/A  *Cross-sectional study*—If applicable, describe analytical methods taking account of sampling strategy  page(s) N/A |
| (*e*) Describe any sensitivity analyses  page(s) ROC and AUC pages 15-16 |

| Results | | |
| --- | --- | --- |
| Participants | 13* | (a) Report numbers of individuals at each stage of study—eg numbers potentially eligible, examined for eligibility, confirmed eligible, included in the study, completing follow-up, and analysed  page(Figure 1) |
| (b) Give reasons for non-participation at each stage  page(s) Figure 1 |
| (c) Consider use of a flow diagram  page(s) Figure 1 |
| Descriptive data | 14* | (a) Give characteristics of study participants (e.g., demographic, clinical, social) and information on exposures and potential confounders  page(s) Table 1 |
| (b) Indicate number of participants with missing data for each variable of interest  page(s) Table 1-4 |
| (c) *Cohort study*—Summarise follow-up time (e.g., average and total amount)  page(s) N/A |
| Outcome data | 15* | *Cohort study*—Report numbers of outcome events or summary measures over time  page(s) N/A |
| *Case-control study—*Report numbers in each exposure category, or summary measures of exposure  page(s) Table 1 – Page 30 / Table 2 – Page 31 |
| *Cross-sectional study—*Report numbers of outcome events or summary measures  page(s) N/A |
| Main results | 16 | (*a*) Give unadjusted estimates and, if applicable, confounder-adjusted estimates and their precision (e.g., 95% confidence interval). Make clear which confounders were adjusted for and why they were included  page(s) Table 2-4 |
| (*b*) Report category boundaries when continuous variables were categorized  page(s) Table 2-4 |
| (*c*) If relevant, consider translating estimates of relative risk into absolute risk for a meaningful time period  page(s) N/A |
| Other analyses | 17 | Report other analyses done—eg analyses of subgroups and interactions, and sensitivity analyses  page(s) Tables 3-6, pages 33-342-4 |
| Discussion | | |
| Key results | 18 | Summarise key results with reference to study objectives  page(s) 10-12 |
| Limitations | 19 | Discuss limitations of the study, taking into account sources of potential bias or imprecision. Discuss both direction and magnitude of any potential bias  page(s) 12 |
| Interpretation | 20 | Give a cautious overall interpretation of results considering objectives, limitations, multiplicity of analyses, results from similar studies, and other relevant evidence  page(s) 10-12 |
| Generalizability | 21 | Discuss the generalizability (external validity) of the study results  page(s) 11 |
| Other information | | |
| Funding | 22 | Give the source of funding and the role of the funders for the present study and, if applicable, for the original study on which the present article is based  page(s) 12 |

*Give information separately for cases and controls in case-control studies and, if applicable, for exposed and unexposed groups in cohort and cross-sectional studies.
